# Supplementary material
Source: Elsevier journal article supplement (https://www.sciencedirect.com/science/article/pii/S2387020622002364)
Supplement: mmc3 [file S2387020622002364:mmc3.docx]

**Tabla suplementaria 3**. “Análisis uni y multivariable de la mortalidad por cualquier causa de los pacientes hospitalizados por COVID-19 con retirada de estatinas en el ingreso”.

|  | **Univariable** | | | **Multivariable** | | |
| --- | --- | --- | --- | --- | --- | --- |
| Variable | Haz. Ratio | Err. Std. | p | Haz. Ratio | Err. Std. | p |
| Retirada estatinas | 1,14 (0,91-1,44) | 0,13 | 0,252 | 1,01 (0,78-1,30) | 0,13 | 0,967 |
| Edad (por año) | 1,06 (1,05-1,07) | 0,01 | 0,000 | 1,06 (1,05-1,08) | 0,01 | 0,000 |
| Sexo masculino | 1,38 (1,09-1,76) | 0,17 | 0,009 | 1,63 (1,24-2,15) | 0,23 | 0,000 |
| Hipertensión | 1,33 (1,02-1,72) | 0,18 | 0,036 | 0,91 (0,68-1,22) | 0,14 | 0,525 |
| Diabetes | 1,16 (0,92-1,47) | 0,14 | 0,200 | 1,08 (0,83-1,40) | 0,14 | 0,568 |
| Dislipemia | 1,03 (0,59-1,80) | 0,29 | 0,907 | 1,01 (0,55-1,86) | 0,31 | 0,968 |
| Insuficiencia cardiaca | 1,45 (1,04-2,02) | 0,25 | 0,030 | 0,90 (0,60-1,35) | 0,19 | 0,623 |
| Cardiopatía isquemica | 1,15 (0,87-1,52) | 0,16 | 0,338 | 0,65 (0,44-0,95) | 0,13 | 0,026 |
| Ictus/AIT | 1,77 (1,32-2,39) | 0,27 | 0,000 | 1,44 (1,05-1,99) | 0,24 | 0,026 |
| Vasculopatía periférica | 1,63 (1,24-2,13) | 0,22 | 0,000 | 1,38 (0,96-1,98) | 0,25 | 0,080 |
| FA/FTA | 1,87 (1,43-2,44) | 0,25 | 0,000 | 1,27 (0,94-1,72) | 0,20 | 0,124 |
| Insuficiencia renal crónica | 1,78 (1,32-2,41) | 0,27 | 0,000 | 1,31 (0,94-1,83) | 0,22 | 0,104 |
| EPOC | 1,20 (0,88-1,64) | 0,19 | 0,255 | 1,00 (0,70-1,45) | 0,19 | 0,987 |
| Hepatopatía crónica | 0,73 (0,30-1,78) | 0,33 | 0,493 | 0,62 (0,24-1,58) | 0,30 | 0,319 |
| PAS en urgencias (por mmHg) | 1,00 (0,99-1,00) | 0,00 | 0,085 | 0,99 (0,99-1,00) | 0,00 | 0,006 |
| SatO2 en urgencias (por %) | 0,94 (0,93-0,95) | 0,00 | 0,000 | 0,95 (0,94-0,96) | 0,01 | 0,000 |
| Hidroxicloroquina | 0,55 (0,38-0,79) | 0,10 | 0,001 | 0,57 (0,35-0,91) | 0,14 | 0,019 |
| Azitromicina | 0,64 (0,51-0,81) | 0,07 | 0,000 | 0,76 (0,58-0,99) | 0,10 | 0,044 |
| Lopinavir/Ritonavir | 1,10 (0,81-1,51) | 0,18 | 0,537 | 0,83 (0,56-1,24) | 0,17 | 0,364 |
| Glucocorticoides | 1,93 (1,53-2,45) | 0,23 | 0,000 | 2,08 (1,60-2,69) | 0,28 | 0,000 |
